# Supplementary material for: Comparison of haploidentical and umbilical cord blood transplantation after myeloablative conditioning
Source: PubMed Central journal article supplement — Blood Adv. 2021 Oct 20;5(20):4064–72. doi: 10.1182/bloodadvances.2021004462 (PMC8945645; doi:10.1182/bloodadvances.2021004462), 2021-10-20
Supplement: advancesADV2020004106-suppl1.pdf [file advancesADV2020004106-suppl1.pdf]

**Supplemental Table 1. Patient treatment history**

| Patient UPN | Prior lines of therapy                                                                             |
|-------------|----------------------------------------------------------------------------------------------------|
| 286         | High dose methotrexate, rituximab                                                                  |
|             | High dose methotrexate                                                                             |
|             | High dose methotrexate                                                                             |
| 310         | Rituximab, cyclophosphamide, doxorubicin, vincristine, prednisone                                  |
|             | Radiation                                                                                          |
|             | High dose methotrexate + cytarabine → rituximab, methotrexate                                      |
|             | Hyper fractionated cyclophosphamide, vincristine, doxorubicin, prednisone, rituximab, lenalidomide |
|             | Radiation, lenalidomide                                                                            |
|             | Pomalidomide, radiation                                                                            |
| 272         | Methotrexate, radiation                                                                            |
|             | Rituximab, cytarabine, methotrexate                                                                |
|             | Methotrexate, cyclophosphamide, doxorubicin, vincristine, prednisone                               |
|             | Rituximab, Melphalan, carboplatin                                                                  |
|             | Brentuximab vedotin, rituximab                                                                     |
|             | Dendritic cell vaccine, nivolumab, rituximab                                                       |
|             | Bevacizumab, nivolumab, radiation                                                                  |
|             | P53 gene therapy, nivolumab                                                                        |
|             | Ipilimumab                                                                                         |
|             | Ibrutinib                                                                                          |
|             | Rituxan, nivolumab                                                                                 |
|             | Radiation                                                                                          |
| 346         | Methotrexate, cytarabine, thiotepa, rituximab                                                      |
|             | High dose methotrexate                                                                             |
| 475         | High dose methotrexate, rituximab, temozolamide                                                    |
|             | Etoposide, cytarabine consolidation                                                                |
|             | Lenalidomide maintenance                                                                           |
|             | High dose methotrexate, rituximab, temozolamide                                                    |
|             | Nivolumab, ibrutinib                                                                               |
